# Supplementary material
Source: Research Square preprint supplement (doi:10.21203/rs.3.rs-8807313/v1)
Supplement: Supplementary file 1 [file 0ed54e0ce5f273d952ad79c2.docx]

Supplementary Material

# Supplementary Tables

#### **Table 1.**

#### Characteristics of the participants(n=236).

| Variables |  | Number/N（%） |
| --- | --- | --- |
| BMI | ＜24 | 117（49.6） |
| ≥24 | 119（50.4） |
| Marital status | Unmarried | 2（0.8） |
| Married | 226（95.8） |
| Widowed | 5（2.1） |
| Divorced | 3（1.3） |
| Place of residence | Urban area | 170（72） |
| Rural area | 66（28） |
| Educational level | Elementary school and below | 86（36.4） |
| Junior high school | 61（25.8） |
| High school or technical secondary school | 49（20.8） |
| Junior college or above | 40（16.9） |
| Smoking history | No | 142（60.2） |
| Yes | 94（39.8） |
| Alcohol consumption history | No | 167（70.8） |
| Yes | 69（29.2） |
| Comorbid chronic diseases | No | 95（40.3） |
| Yes | 141（59.7） |
| History of TURP | No | 217(91.9) |
| Yes | 19(8.1) |
| Clinical stage | ≤T2a | 134（56.8） |
| T2b | 14（5.9） |
| ≥T2c | 88（37.3） |
| Gleason score | ≤6 | 67（28.4） |
| 7 | 86（36.4） |
| 8 | 39（16.5） |
| ≥9 | 44（18.6） |

#### **Table 2.**

#### Statistical results of the mean and standard deviation of items

| **Item** | **Mean** | **SD** |
| --- | --- | --- |
| I1.I worry about not being able to get to the toilet on time | 3.04 | 0.80 |
| I2.I worry about coughing or sneezing because of my incontinence | 2.85 | 0.67 |
| I3.I have to be careful standing up after I’ve been sitting down because of my incontinence | 3.22 | 0.83 |
| I4.I worry about where toilets are in new places | 2.75 | 1.01 |
| I5.I feel depressed because of my incontinence | 3.36 | 0.77 |
| I6.Because of my incontinence, I don’t feel free to leave my home for long periods of time | 2.57 | 1.08 |
| I7.I feel frustrated because my incontinence prevents me from doing what I want | 3.47 | 0.80 |
| I8.I worry about others smelling urine on me | 3.32 | 0.79 |
| I9.Incontinence is always on my mind | 2.64 | 0.73 |
| I10.It’s important for me to make frequent trips to the toilet | 2.79 | 0.76 |
| I11.Because of my incontinence, it’s important to plan every detail in advance | 2.26 | 0.92 |
| I12.I worry about my incontinence getting worse as I grow older | 3.80 | 0.67 |
| I13.I have a hard time getting a good night of sleep because of my incontinence | 3.38 | 0.86 |
| I14.I worry about being embarrassed or humiliated because of my incontinence | 3.29 | 0.78 |
| I15.My incontinence makes me feel like I’m not a healthy person | 3.78 | 0.61 |
| I16.My incontinence makes me feel helpless | 3.30 | 0.80 |
| I17.I get less enjoyment out of life because of my incontinence | 3.45 | 0.74 |
| I18.I worry about wetting myself | 2.56 | 0.66 |
| I19.I feel like I have no control over my bladder | 3.80 | 0.67 |
| I20.I have to watch what I drink because of my incontinence | 3.28 | 0.80 |
| I21.My incontinence limits my choice of clothing | 4.13 | 0.78 |
| I22.I worry about having sex because of my incontinence | 4.15 | 0.73 |

# Supplementary Figures

**Figure 1.**


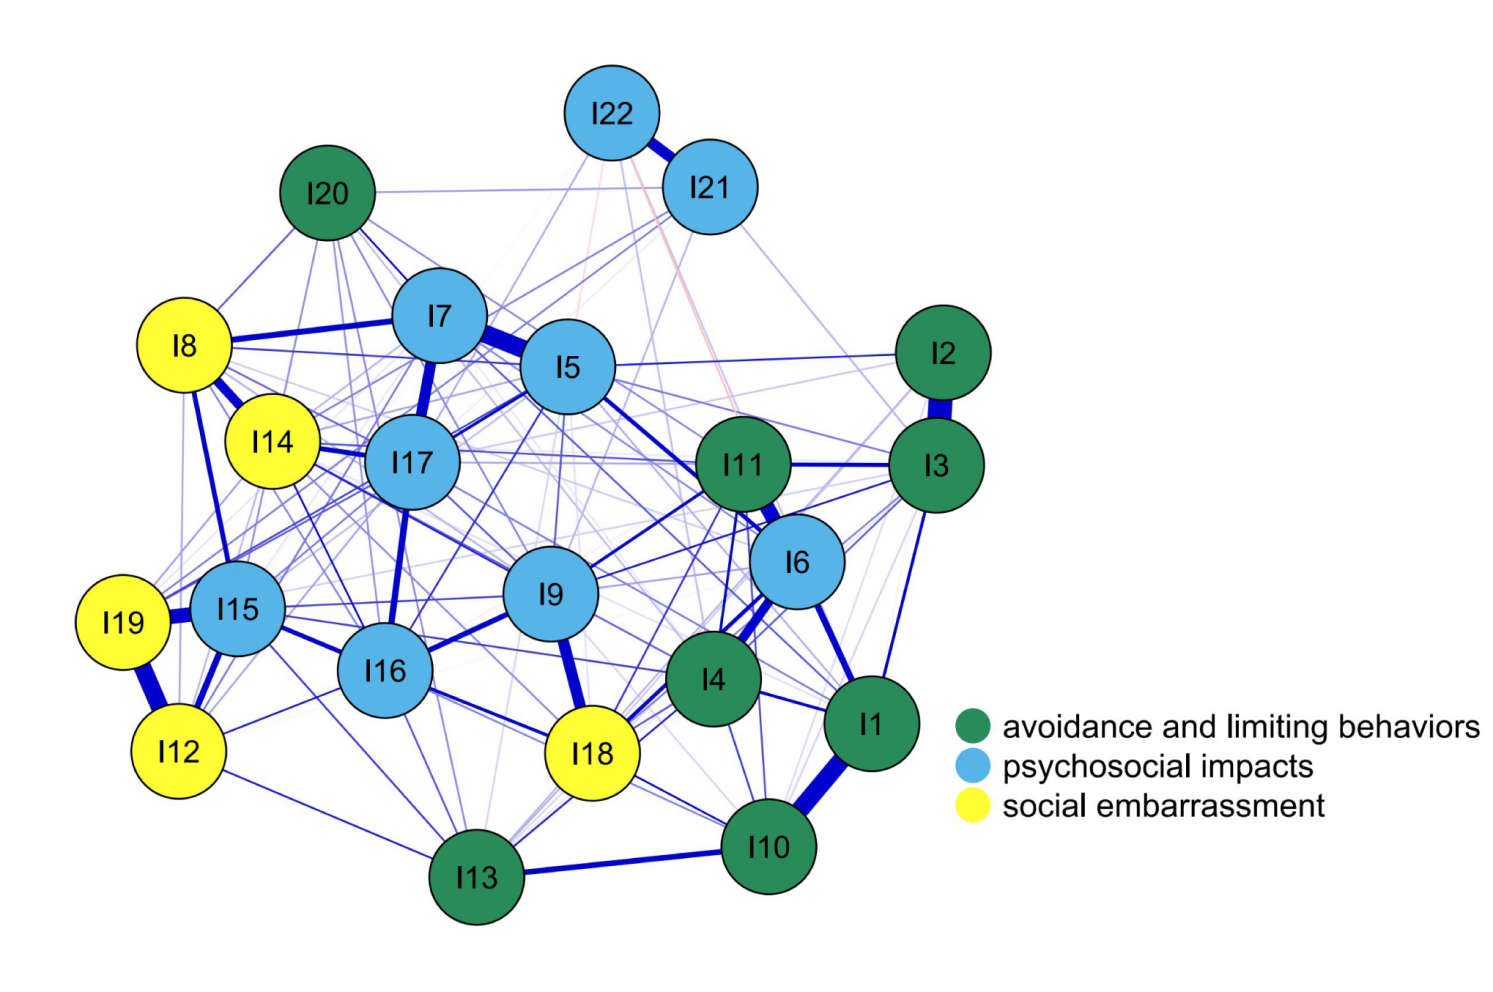


The symptom network of incontinence-related quality of life. Three different colors represent three dimensions. Blue edges indicate positive correlations, and red edges represent negative correlations. The thickness of the edges reflects the strength of the connection between symptoms.

**Figure 2.**

**
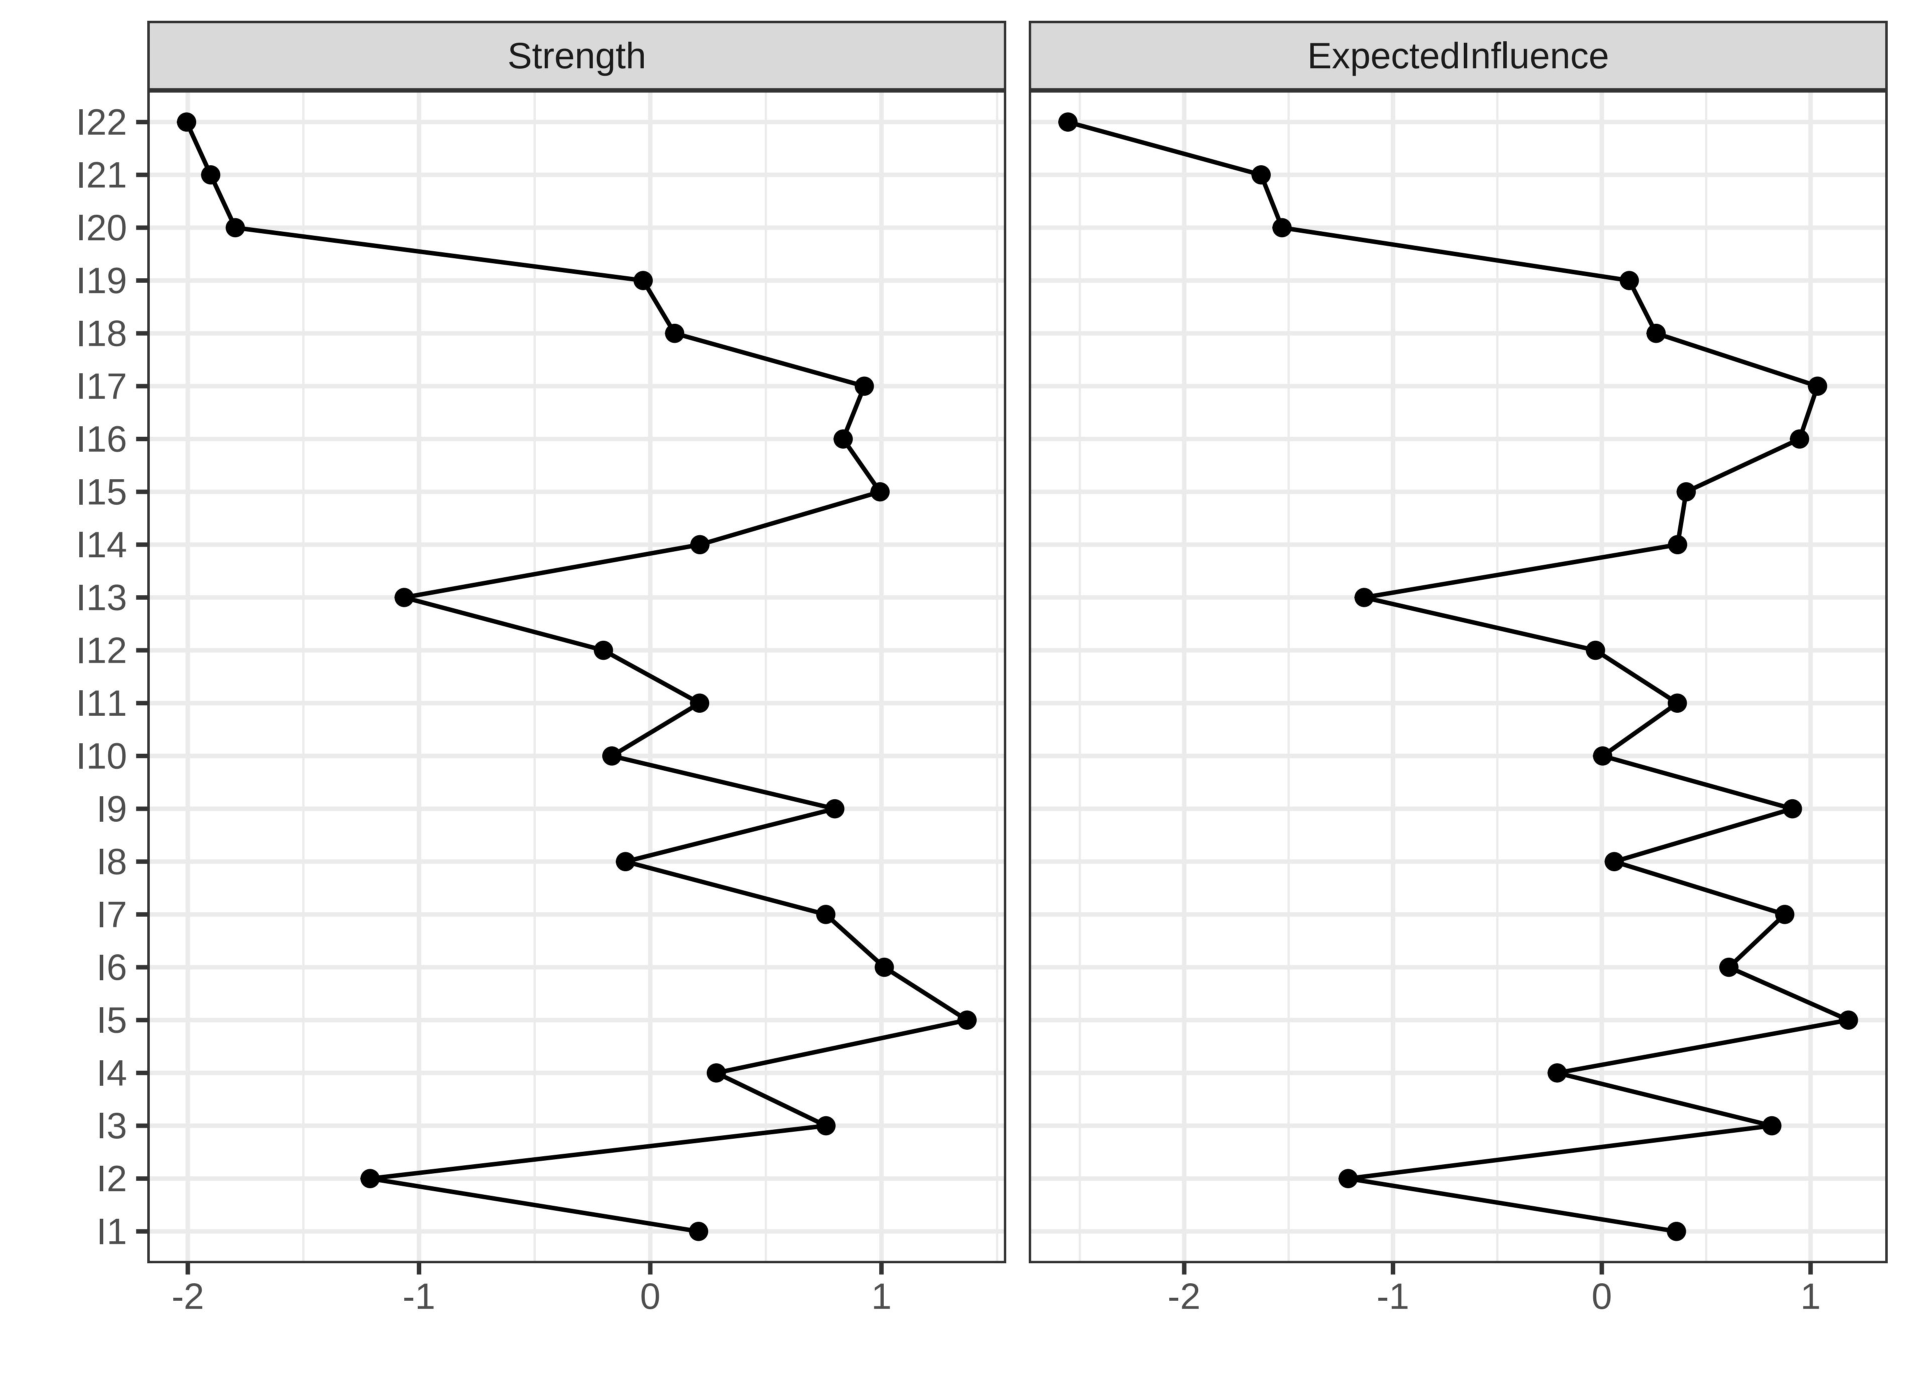

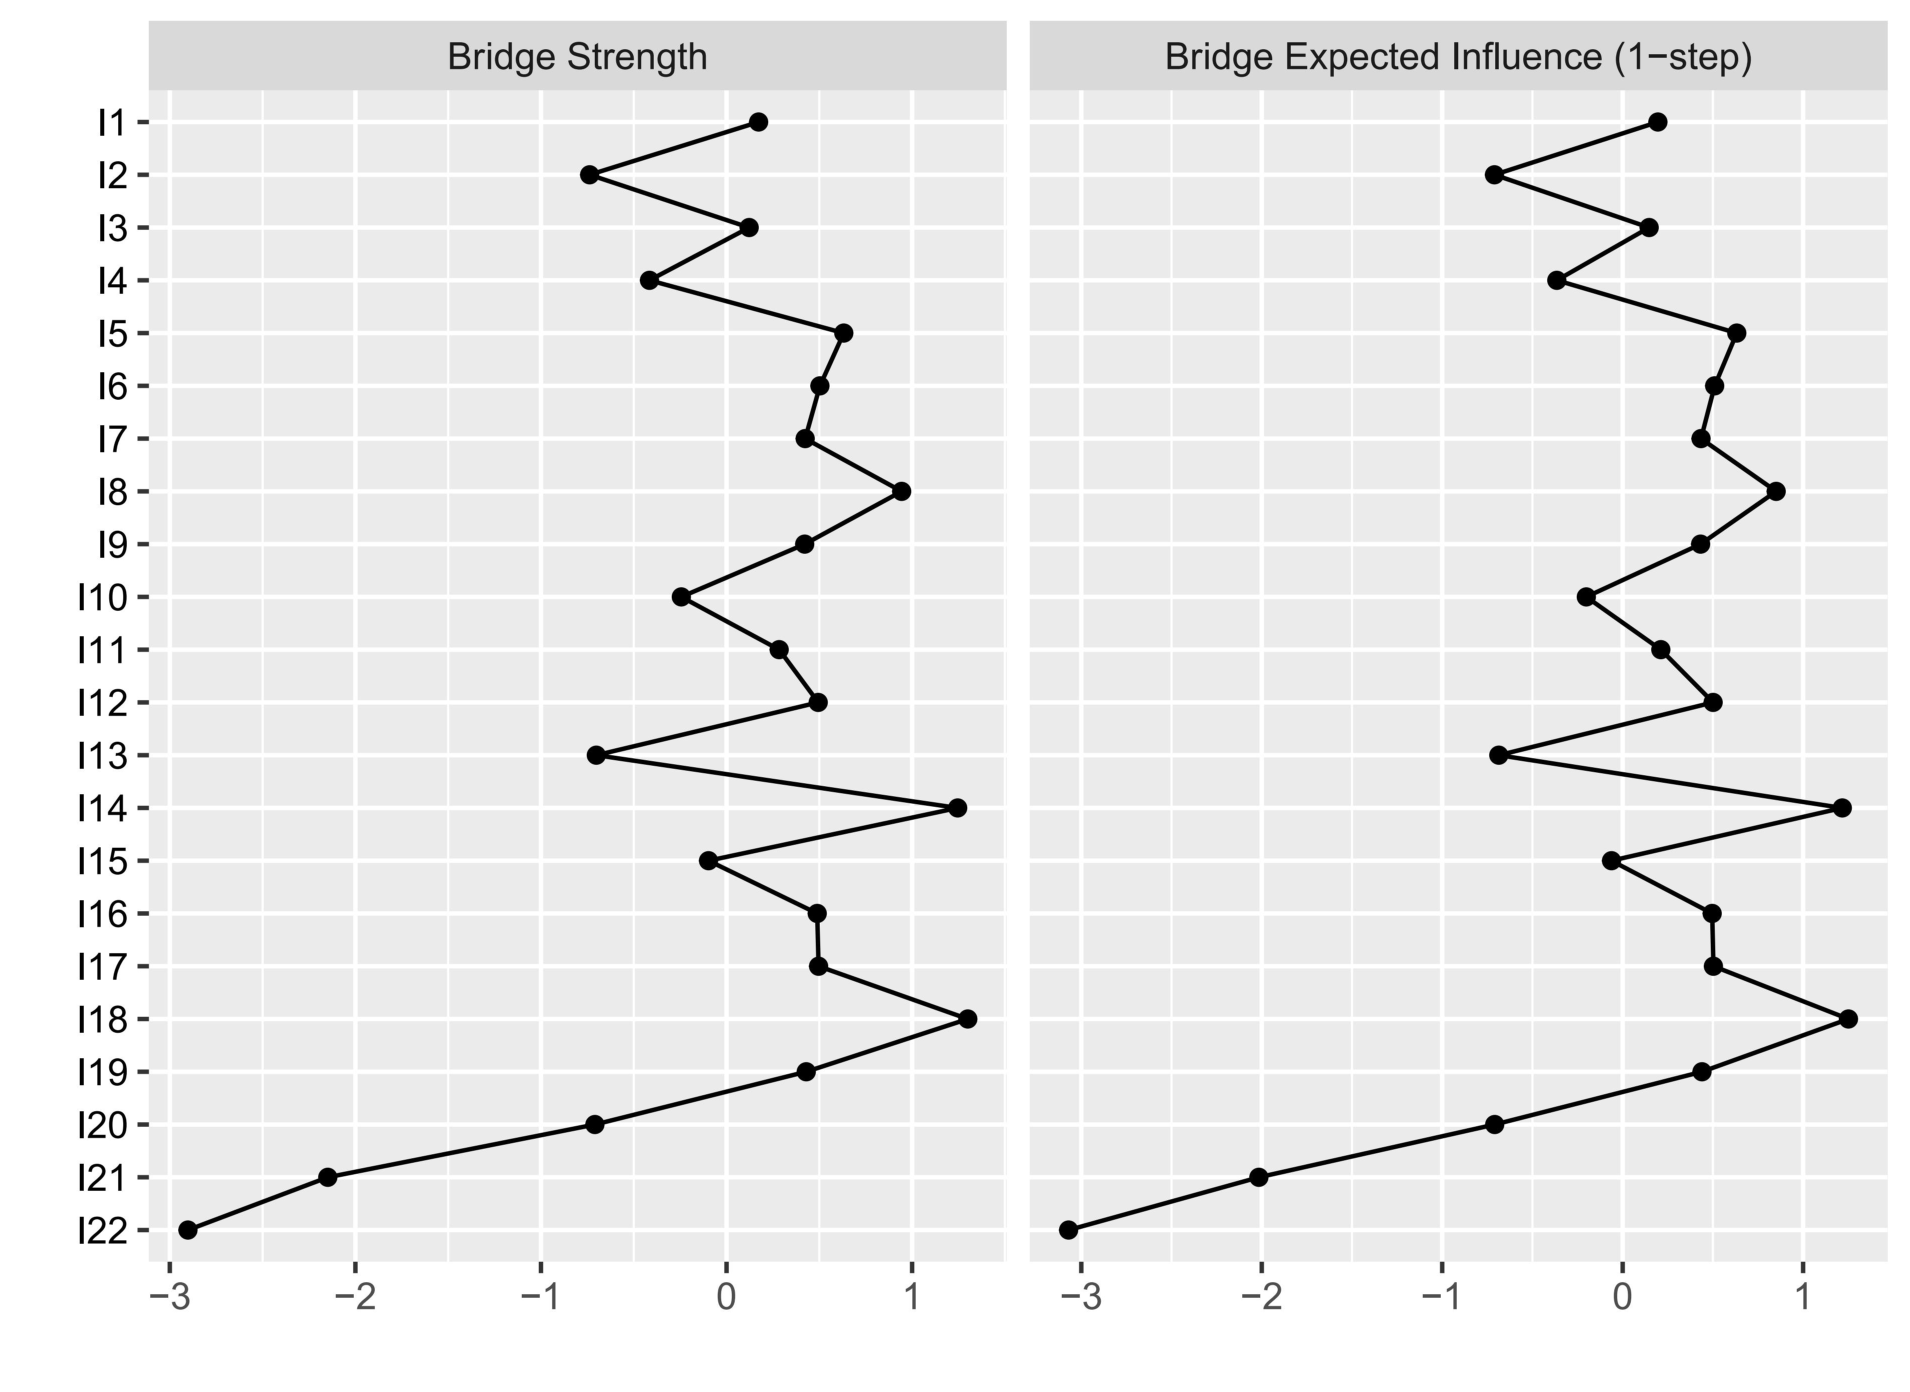
**

1. (B)

Centrality indices of symptom networks.(A)Node strength centrality and expected influence coefficient.(B)Bridge strength centrality and bridge expected influence coefficient.

**Figure 3.**

**
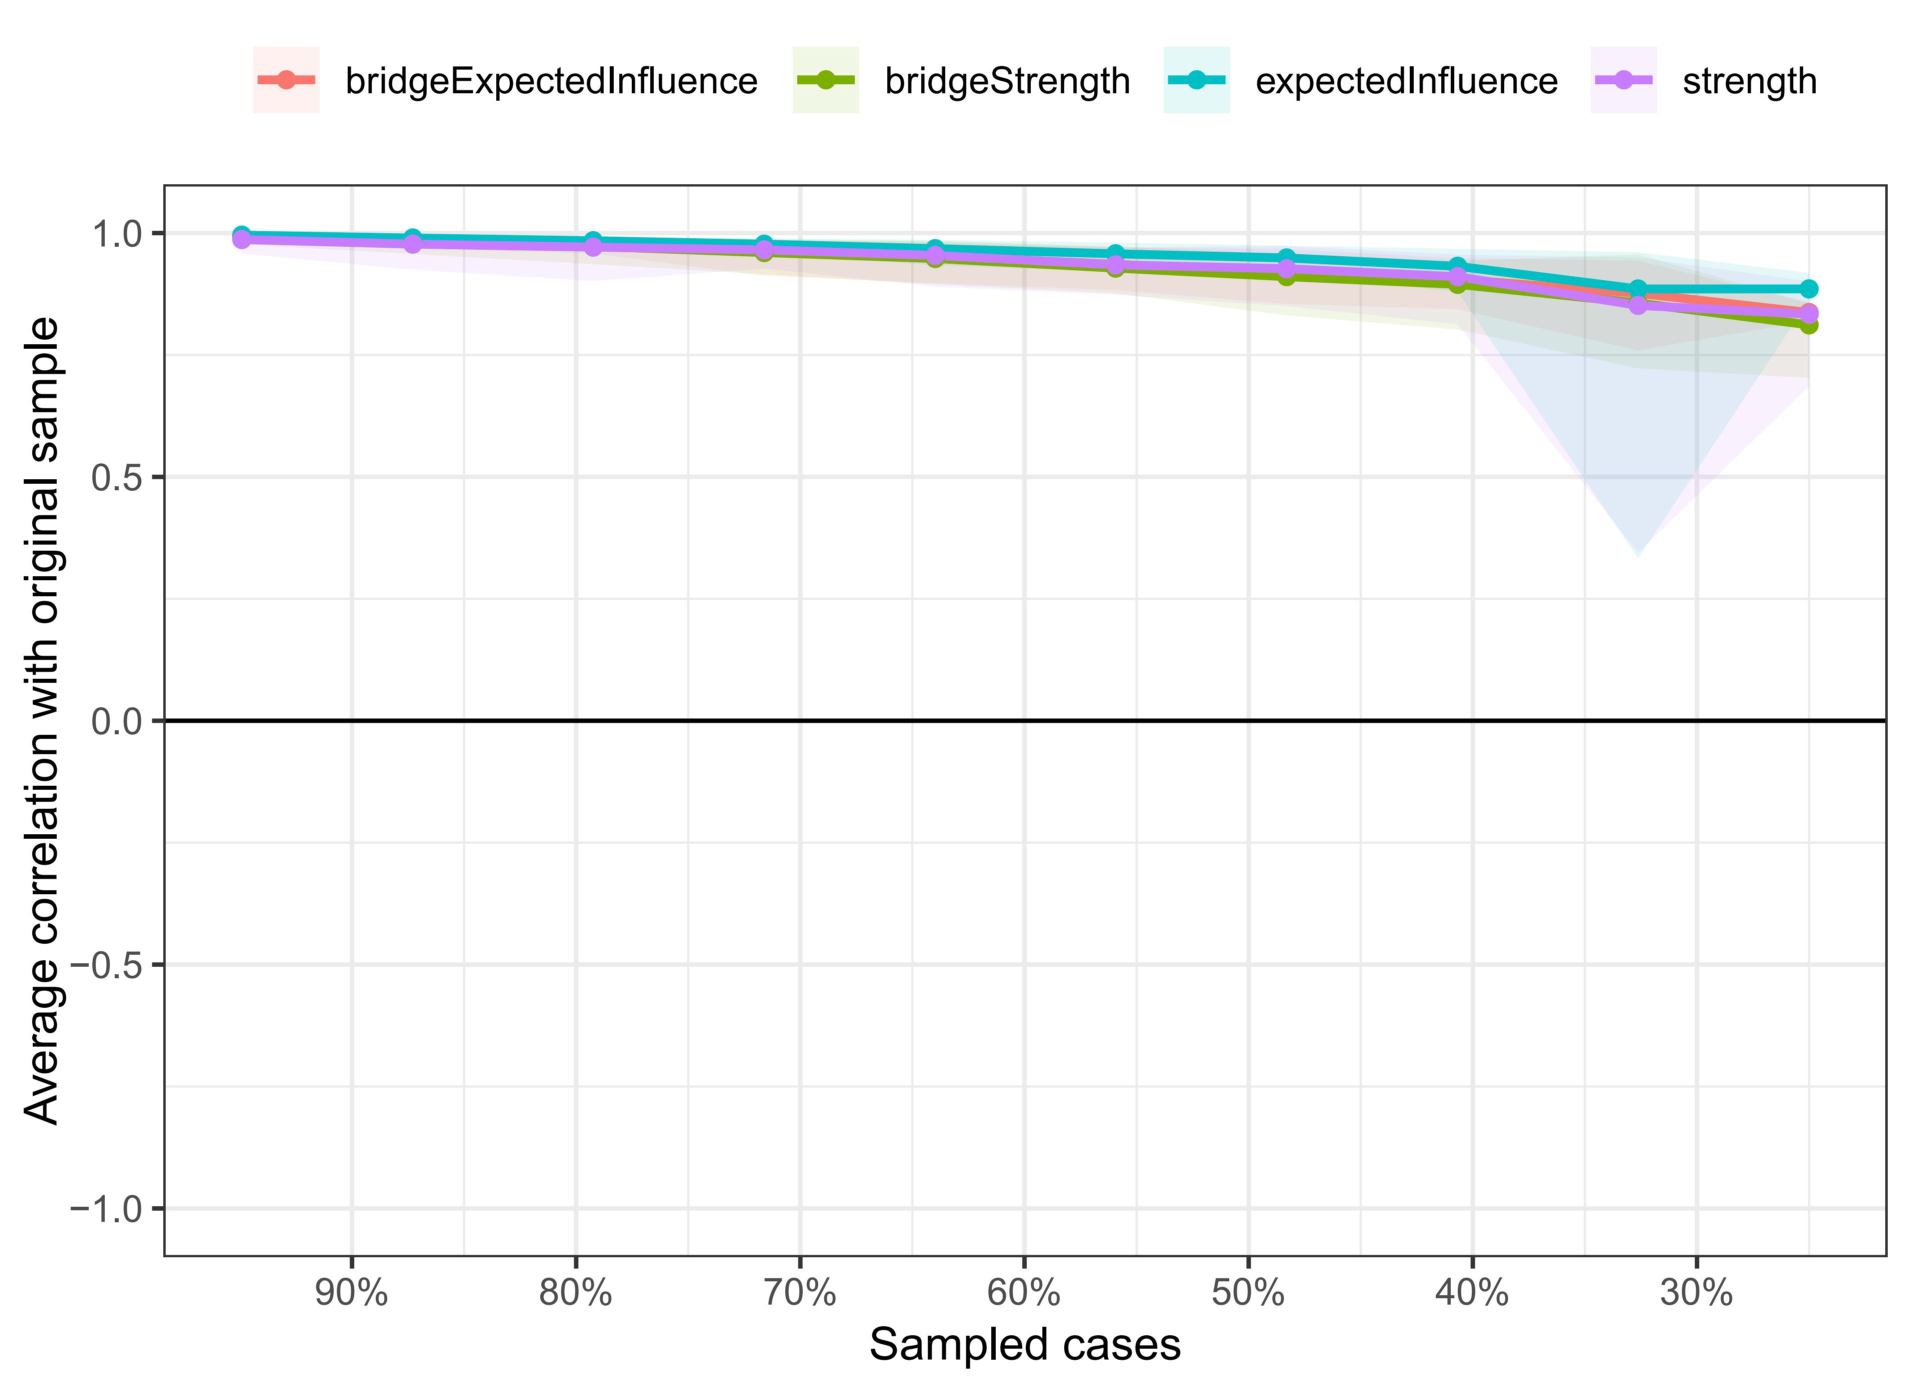

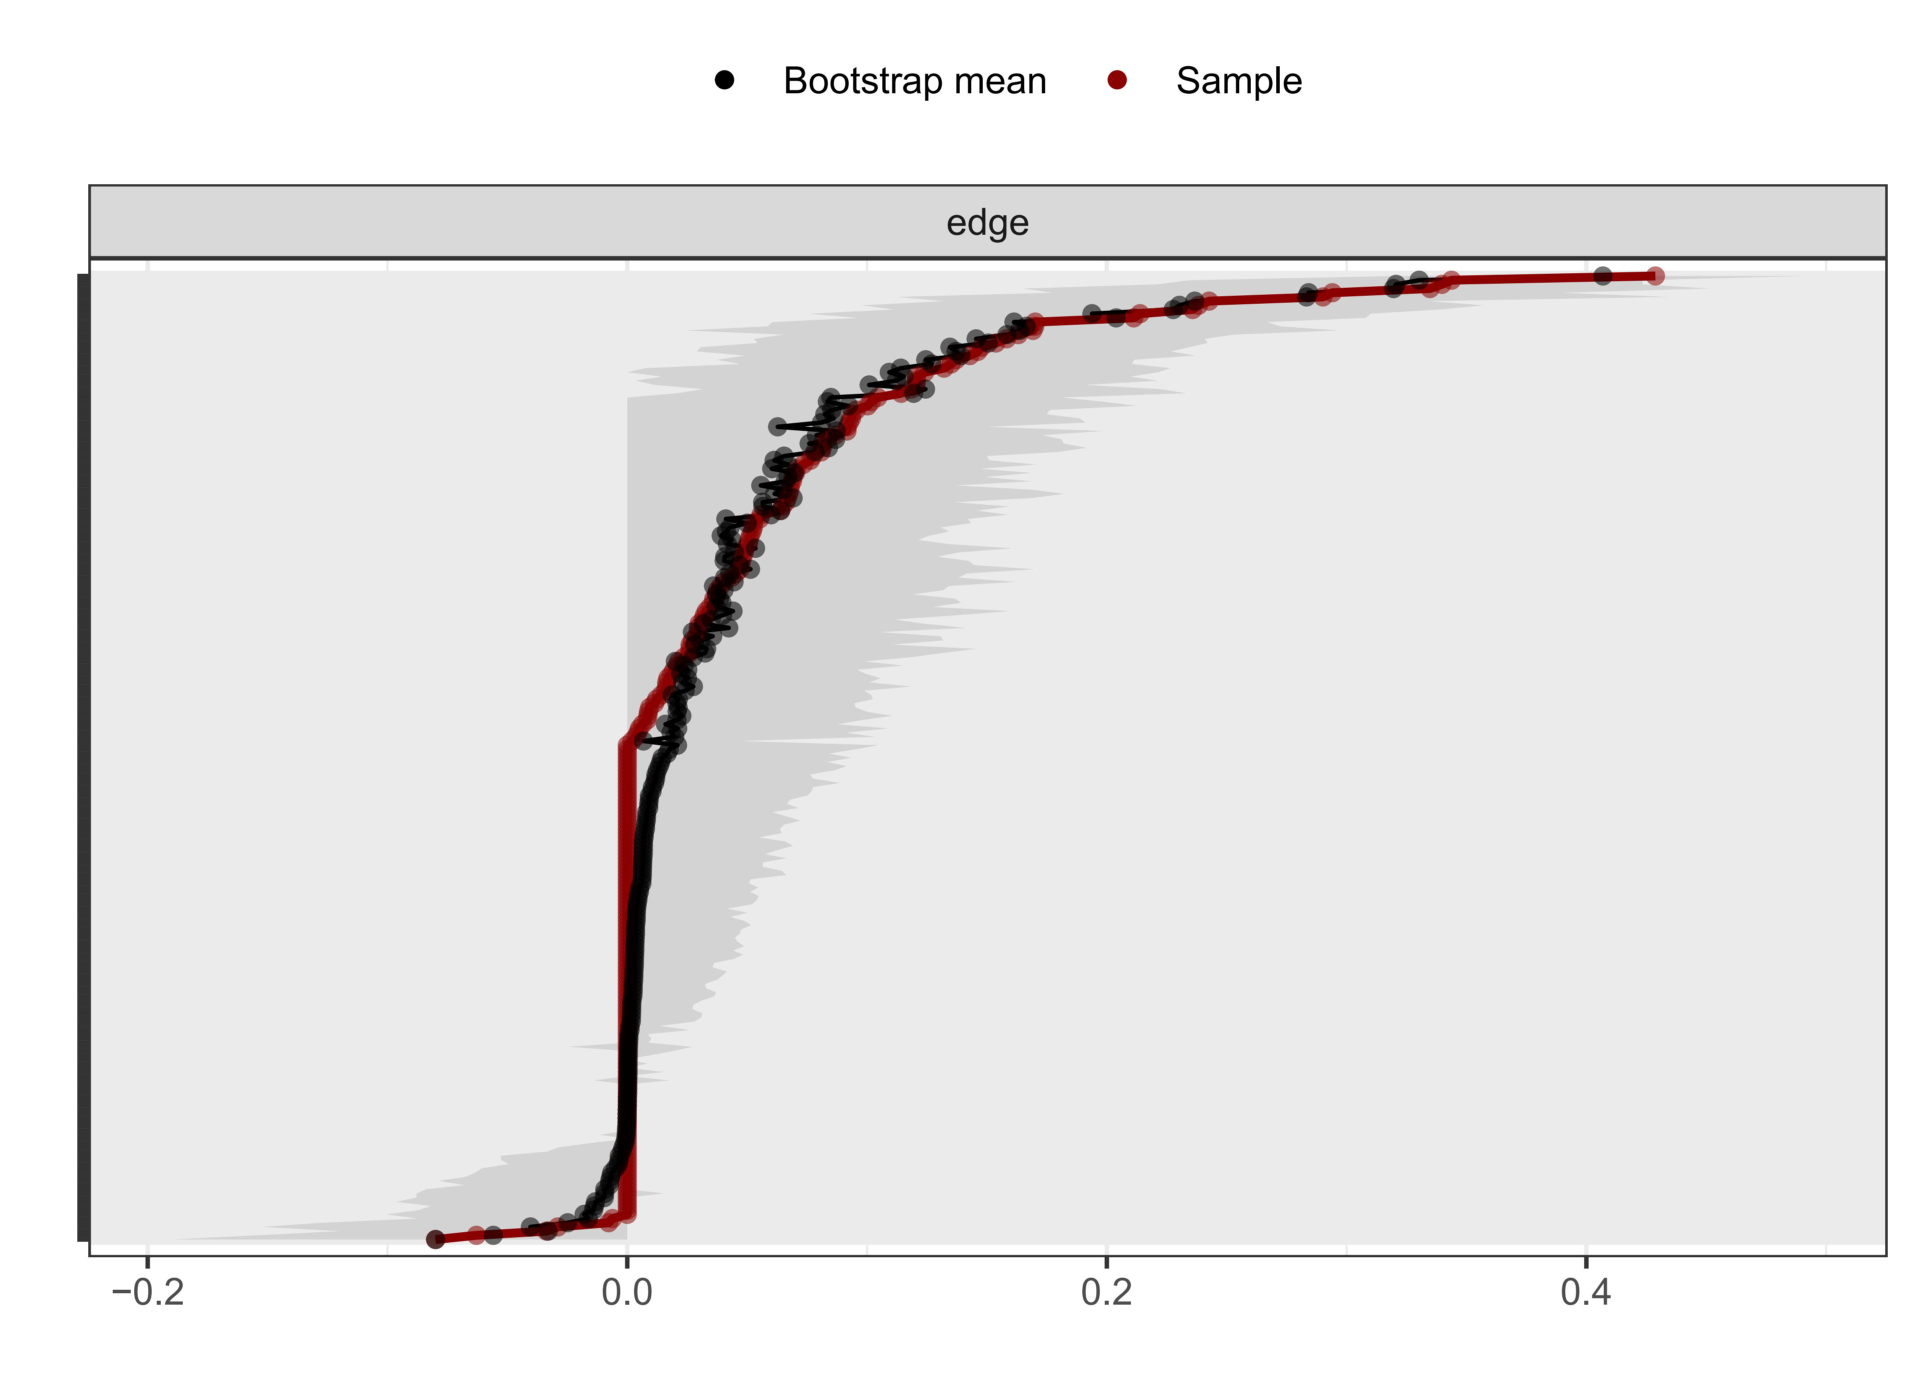
**

1. **(B)**

Stability and accuracy of the network structure.(A)Correlation stability coefficients of the symptom network.(B)Accuracy analysis of edge weights.
